# Supplementary material
Source: PubMed Central journal article supplement (PMC60853)
Supplement: pnas_98_23_13231__1.pdf [file pnas_98_23_13231__1.pdf]

Supporting information for Roisman *et al.*  
(2001) *Proc. Natl. Acad. Sci. USA* **98** (23),  
13231–13236. (10.1073/pnas.221290398)

**Table 2. Kinetic and thermodynamic parameters for interacting mutants of IFN $\alpha$ 2 – ifnar2**

| ifnar2      | IFN $\alpha$ 2 | $k_d^a$<br>(s <sup>-1</sup> ) | $\Delta\Delta G^b$<br>(kJ/mol) | $K_D^c$<br>( $\mu$ M) | $\Delta\Delta G^d$<br>(kJ/mol) |
|-------------|----------------|-------------------------------|--------------------------------|-----------------------|--------------------------------|
| WT          | WT             | 0.011                         |                                | 0.0025                |                                |
| Y45A        | WT             | 0.075                         | -4.6                           |                       |                                |
| T46A        | WT             | 0.116                         | -5.7                           | 0.074                 | -8.2                           |
| I47A        | WT             | 0.191                         | -6.9                           | 0.065                 | -7.8                           |
| M48V        | WT             |                               |                                | 0.349                 | -11.9                          |
| K50A        | WT             | 0.032                         | -2.5                           |                       |                                |
| K55A        | WT             | 0.032                         | -2.6                           |                       |                                |
| H78A        | WT             | 0.028                         | -2.3                           | 0.019                 | -4.9                           |
| E79A        | WT             | 0.308                         | -8.0                           | 0.152                 | -9.9                           |
| W102A       | WT             | 0.051                         | -3.7                           | 0.034                 | -6.3                           |
| I105A       | WT             | 0.097                         | -5.2                           | 0.045                 | -6.9                           |
| D106A       | WT             | 0.022                         | -1.7                           | 0.039                 | -6.6                           |
| WT          | R12A           | 0.030                         | -2.4                           |                       |                                |
| WT          | L15A           | 0.102                         | -5.4                           | 0.069                 | -8.0                           |
| WT          | L26A           | 0.050                         | -3.7                           | 0.031                 | -6.1                           |
| WT          | F27A           | 0.027                         | -2.2                           |                       |                                |
| WT          | L30A           |                               |                                | 1.700                 | -15.7                          |
| WT          | D35A           | 0.022                         | -1.6                           |                       |                                |
| WT          | K133A          | 0.017                         | -1.1                           |                       |                                |
| WT          | R144A          | 0.043                         | -3.3                           | 0.099                 | -8.9                           |
| WT          | A145G          | 0.206                         | -7.1                           | 0.096                 | -8.8                           |
| WT          | M148A          | 0.322                         | -8.1                           | 0.143                 | -9.8                           |
| WT          | R149A          |                               |                                | 0.540                 | -12.9                          |
| WT          | S152A          | 0.039                         | -3.1                           | 0.016                 | -4.5                           |
| WT          | L153A          | 0.119                         | -5.7                           | 0.040                 | -6.7                           |
| Y45A        | L26A           | 0.300                         | -8.2                           |                       |                                |
| <b>Y45A</b> | <b>F27A</b>    | 0.060                         | -4.2                           |                       |                                |
| Y45A        | D35A           | 0.110                         | -5.7                           |                       |                                |
| Y45A        | R144A          | 0.170                         | -6.8                           |                       |                                |
| Y45A        | S152A          | 0.189                         | -7.0                           |                       |                                |
| M48V        | L15A           |                               |                                | 4.400                 | -18.0                          |
| M48V        | L26A           |                               |                                | 3.650                 | -17.5                          |
| M48V        | L30A           |                               |                                | 410.0                 | -28.9                          |
| <b>M48V</b> | <b>R144A</b>   |                               |                                | 1.300                 | -15.1                          |
| M48V        | A145G          |                               |                                | 19.20                 | -21.6                          |
| M48V        | M148A          |                               |                                | 25.00                 | -22.3                          |
| M48V        | R149A          |                               |                                | 70.00                 | -24.6                          |
| M48V        | S152A          |                               |                                | 2.450                 | -16.6                          |
| M48V        | L153A          |                               |                                | 5.260                 | -18.4                          |
| K50A        | R12A           | 0.090                         | -5.2                           |                       |                                |
| K50A        | F27A           | 0.083                         | -5.0                           |                       |                                |
| <b>K50A</b> | <b>D35A</b>    | 0.015                         | -0.8                           |                       |                                |
| K50A        | K133A          | 0.063                         | -4.3                           |                       |                                |
| E79A        | L15A           |                               |                                | 2.500                 | -16.6                          |
| E79A        | L30A           |                               |                                | 69.00                 | -24.6                          |
| E79A        | R144A          |                               |                                | 6.500                 | -19.0                          |
| E79A        | A145G          |                               |                                | 12.40                 | -20.5                          |
| E79A        | M148A          |                               |                                | 11.20                 | -20.2                          |
| <b>E79A</b> | <b>R149A</b>   |                               |                                | 1.150                 | -14.8                          |
| E79A        | S152A          |                               |                                | 0.990                 | -14.4                          |
| E79A        | L153A          |                               |                                | 1.450                 | -15.3                          |
| H78A        | R12A           | 0.115                         | -5.8                           | 0.105                 | -8.1                           |
| H78A        | L15A           | 0.320                         | -8.3                           | 2.200                 | -9.9                           |
| H78A        | L26A           | 0.190                         | -7.0                           | 0.435                 | -11.6                          |
| H78A        | R149A          |                               |                                | 1.650                 | -14.9                          |
| <b>H78A</b> | <b>S152A</b>   | 0.030                         | -2.5                           | 0.017                 | -3.6                           |
| H78A        | L153A          | 0.350                         | -8.5                           | 0.357                 | -11.1                          |

All measurements were done using RifS.

<sup>a</sup> Dissociation rate constant.

<sup>b</sup>  $\Delta\Delta G$  was calculated from  $k_d$  according to eq. 2.

<sup>c</sup> Values of  $K_D$  were determined from the equilibrium response guided by the law of mass-action.

<sup>d</sup>  $\Delta\Delta G$  was calculated from  $K_D$ .
