# Supplementary material
Source: PubMed Central journal article supplement (PMC60853)
Supplement: pnas_98_23_13231__2.pdf [file pnas_98_23_13231__2.pdf]

**Table 3. Kinetic and thermodynamic parameters for non-interacting mutants of IFN $\alpha$ 2 – ifnar2**

| ifnar2 | IFN $\alpha$ 2 | $k_d^a$<br>(s <sup>-1</sup> ) | $\Delta\Delta G^b$<br>(kJ/mol) | $K_D^c$<br>( $\mu$ M) | $\Delta\Delta G^d$<br>(kJ/mol) |
|--------|----------------|-------------------------------|--------------------------------|-----------------------|--------------------------------|
| T46A   | L15A           |                               |                                | 1.05                  | -14.5                          |
| T46A   | L26A           |                               |                                | 0.77                  | -13.8                          |
| T46A   | F27A           |                               |                                | 0.41                  | -12.3                          |
| T46A   | L30A           |                               |                                | 58.6                  | -24.2                          |
| T46A   | R144A          |                               |                                | 2.32                  | -16.5                          |
| T46A   | A145G          |                               |                                | 3.87                  | -17.7                          |
| T46A   | M148A          |                               |                                | 4.68                  | -18.1                          |
| T46A   | R149A          |                               |                                | 18.2                  | -21.4                          |
| T46A   | S152A          |                               |                                | 0.44                  | -12.4                          |
| T46A   | L153A          |                               |                                | 0.67                  | -13.5                          |
| I47A   | L15A           |                               |                                | -15.3                 |                                |
| I47A   | L26A           |                               |                                | -14.4                 |                                |
| I47A   | F27A           |                               |                                | -13.2                 |                                |
| I47A   | L30A           |                               |                                | -23.6                 |                                |
| I47A   | R144A          |                               |                                | 3.38                  | -17.4                          |
| I47A   | A145G          |                               |                                | 4.76                  | -18.2                          |
| I47A   | M148A          |                               |                                | 3.18                  | -17.2                          |
| I47A   | R149A          |                               |                                | 11.6                  | -20.3                          |
| I47A   | S152A          |                               |                                | 0.40                  | -12.2                          |
| I47A   | L153A          |                               |                                | 1.02                  | -14.5                          |
| K55A   | R12A           | 0.059                         | -4.1                           |                       |                                |
| K55A   | L15A           | 0.147                         | -6.4                           |                       |                                |
| K55A   | L26A           | 0.128                         | -6.1                           |                       |                                |
| K55A   | F27A           | 0.052                         | -3.8                           |                       |                                |
| K55A   | D35A           | 0.032                         | -2.6                           |                       |                                |
| K55A   | K133A          | 0.045                         | -3.5                           |                       |                                |
| K55A   | A145G          | 0.401                         | -8.9                           |                       |                                |
| K55A   | S152A          | 0.118                         | -5.9                           |                       |                                |
| K55A   | L153A          | 0.298                         | -8.1                           |                       |                                |
| W102A  | R12A           |                               |                                | 0.13                  | -9.4                           |
| W102A  | L15A           |                               |                                | 0.45                  | -12.5                          |
| W102A  | M148A          |                               |                                | 1.65                  | -15.6                          |
| W102A  | S152A          |                               |                                | 0.26                  | -11.2                          |
| W102A  | L153A          |                               |                                | 0.36                  | -12.0                          |
| I105A  | WT             |                               |                                | 0.04                  | -7.5                           |
| I105A  | L15A           |                               |                                | 1.38                  | -15.8                          |
| I105A  | L26A           |                               |                                | 0.42                  | -13.0                          |
| I105A  | F27A           |                               |                                | 0.29                  | -12.1                          |
| I105A  | L30A           |                               |                                | 24.7                  | -22.8                          |
| I105A  | R144A          |                               |                                | 0.96                  | -14.9                          |
| I105A  | M148A          |                               |                                | 2.27                  | -17.0                          |
| I105A  | R149A          |                               |                                | 9.91                  | -20.6                          |
| I105A  | S152A          |                               |                                | 0.61                  | -13.9                          |
| I105A  | L153A          |                               |                                | 0.71                  | -14.2                          |
| D106A  | R12A           | 0.112                         | -5.7                           |                       |                                |
| D106A  | L26A           | 0.246                         | -7.7                           | 0.36                  | -12.0                          |
| D106A  | F27A           | 0.053                         | -3.9                           | 0.14                  | -9.8                           |
| D106A  | R144A          | 0.160                         | -6.6                           | 1.23                  | -14.9                          |
| D106A  | S152A          | 0.100                         | -5.4                           | 0.23                  | -10.9                          |
| D106A  | L153A          | 0.314                         | -8.3                           | 0.41                  | -12.3                          |

All measurements were done using RifS.

- <sup>a</sup> Dissociation rate constant.
- <sup>b</sup>  $\Delta\Delta G$  was calculated from  $k_d$  according to eq. 2.
- <sup>c</sup> Values of  $K_D$  were determined from the equilibrium response guided by the law of mass-action.
- <sup>d</sup>  $\Delta\Delta G$  was calculated from  $K_D$ .
